# Supplementary material for: Tailoring carboxylatopillar[5]arene-modified magnetic graphene oxide nanocomposites for the efficient removal of cationic dyes
Source: Royal Society of Chemistry journal article supplement (doi:10.1039/d3ra07124c), 2023-01-01
Supplement: d3ra07124c1.pdf [file d3ra07124c1.pdf]

## *Supporting Information*

### **Tailoring carboxylatopillar[5]arene modified magnetic graphene oxide nanocomposites for efficient removal of cationic dyes**

Yu Huang <sup>†a</sup>, Yanqin Rong <sup>†a</sup>, Wenjia Zhang <sup>a</sup>, Zibin Zhang <sup>\*b</sup>, Xiaoyuan Zhang <sup>a</sup>,

Wenting Liang <sup>\*a</sup>, Cheng Yang <sup>\*a, c</sup>

<sup>a</sup> Institute of Environmental Sciences, Department of Chemistry, Shanxi University, Taiyuan, 030006, China. E-mail: liangwt@sxu.edu.cn (W. T. Liang)

<sup>b</sup> College of Material, Chemistry and Chemical Engineering, Key Laboratory of Organosilicon Chemistry and Material Technology, Ministry of Education, Key Laboratory of Organosilicon Material Technology, Hangzhou Normal University, Hangzhou 311121, China. Email: zzhang@hznu.edu.cn (Z. Zhang)

<sup>c</sup> Key Laboratory of Green Chemistry & Technology of Ministry of Education, Sichuan University, Chengdu 610064, China. E-mail: yangchengyc@scu.edu.cn (C. Yang)

<sup>†</sup> The authors contributed equally: Yu Huang, Yanqin Rong

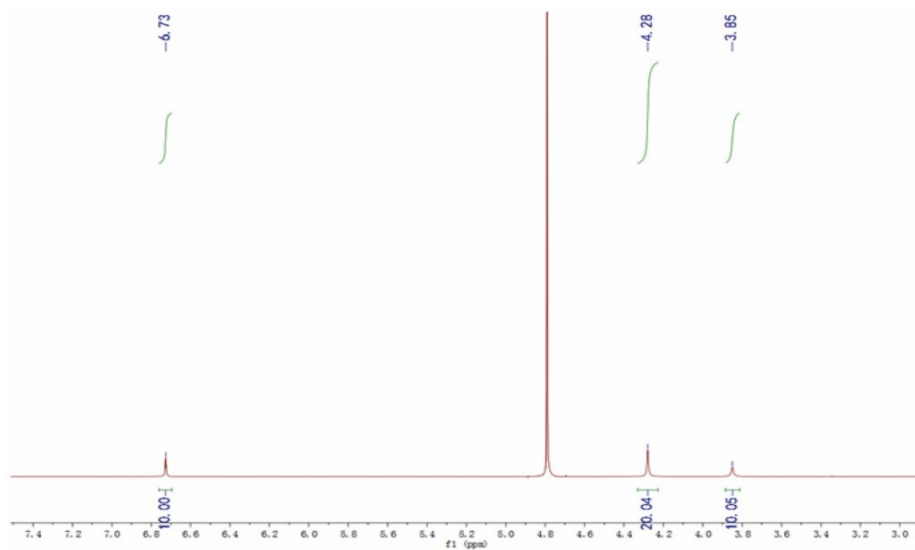

**Fig. S1**  $^1\text{H}$  NMR spectrum of carboxylatopillar[5]arene.  $^1\text{H}$  NMR (500 MHz,  $\text{D}_2\text{O}$ )  $\delta$  6.67 (s, 10H), 4.26 (s, 20H), 3.78 (s, 10H).

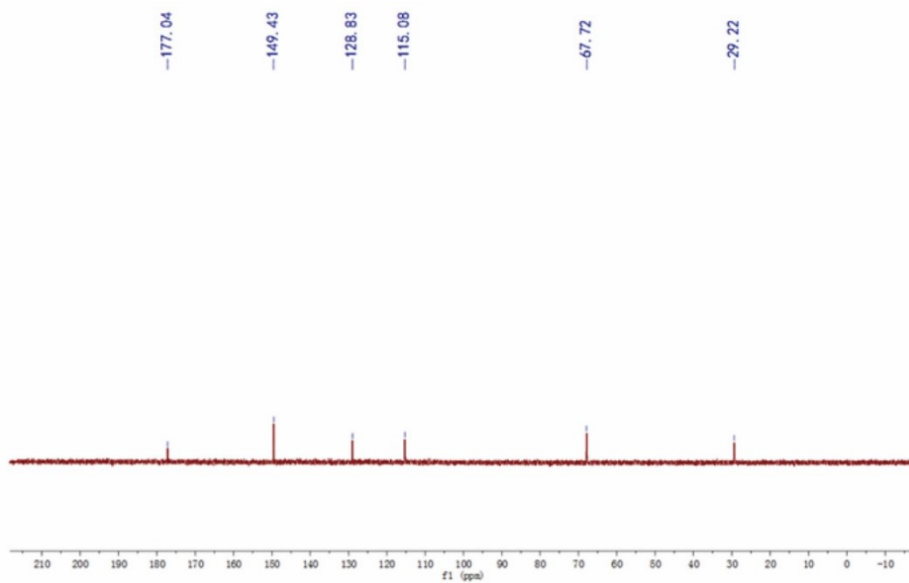

**Fig. S2**  $^{13}\text{C}$  NMR spectrum of carboxylatopillar[5]arene.  $^{13}\text{C}$  NMR (126 MHz,  $\text{D}_2\text{O}$ )  $\delta$  177.04 (s), 149.43 (s), 128.83 (s), 115.08 (s), 67.72 (s), 29.37 (s).

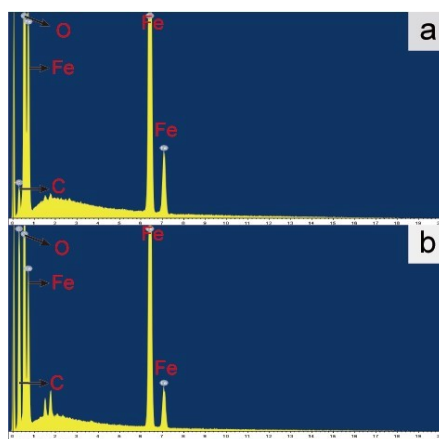

**Fig. S3** The EDS analysis of MGO (a) and MGO@CP5 (b).

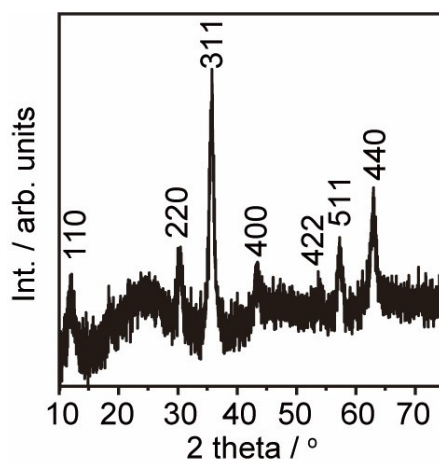

**Fig. S4** XRD pattern of MGO@CP5.

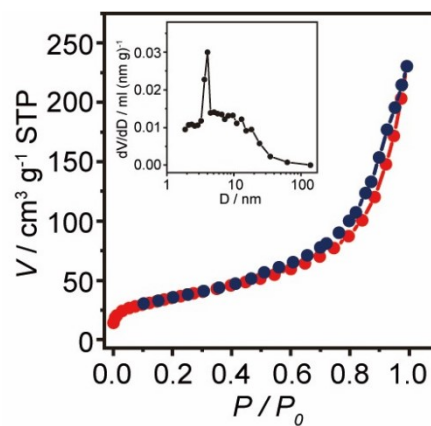

**Fig. S5** N<sub>2</sub> adsorption / desorption isotherms of MGO@CP5. Insert: the pore size distribution curve of MGO@CP5.

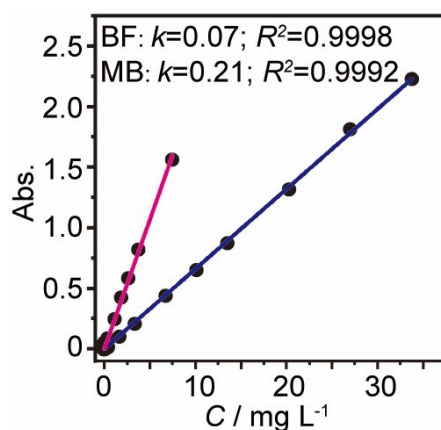

**Fig. S6** The standard curves of BF and MB solution.

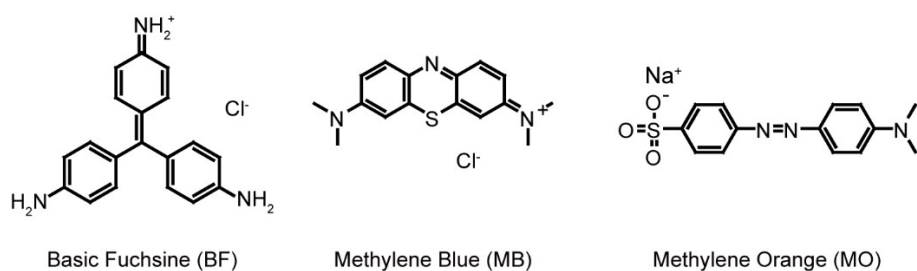

**Fig. S7** The structure of cationic dye (BF and MB) and anionic dye (MO).

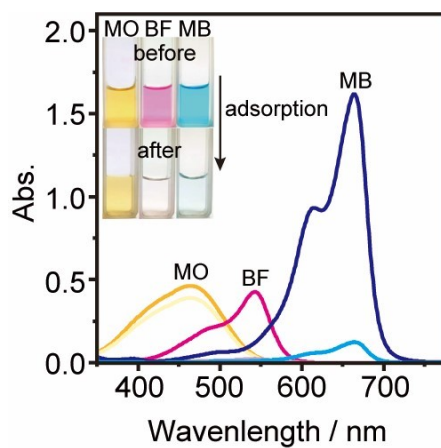

**Fig. S8** The UV-vis absorption spectra of the MO, BF and MB single solution before and after adsorption by MGO@CP5. The insert is the photographic pictures of MO, BF and MB supernatant before and after adsorption on MGO@CP5.

**Table S1** Nitrogen adsorption-desorption parameters of MGO@CP5

| Adsorbent | $S_{\text{BET}} / \text{m}^2 \text{g}^{-1}$ | $V / \text{m}^3 \text{g}^{-1}$ | $D_p / \text{nm}$ |
|-----------|---------------------------------------------|--------------------------------|-------------------|
| MGO@CP5   | 128.3                                       | 0.35                           | 4.03              |

**Table S2** The data of adsorption kinetics of MGO@CP5 towards BF and MB

| Organic dyes                  |                                            | BF     | MB     |
|-------------------------------|--------------------------------------------|--------|--------|
| Pseudo first-order model      | $k_1 (\text{min}^{-1})$                    | 0.1646 | 0.1868 |
|                               | $R^2$                                      | 0.7146 | 0.8638 |
| Pseudo second-order model     | $k_2 (\text{g mg}^{-1} \text{min}^{-1})$   | 0.6277 | 0.3016 |
|                               | $R^2$                                      | 0.9998 | 0.9998 |
| Elovich model                 | $\beta (\text{g mg}^{-1})$                 | 1.8167 | 1.0389 |
|                               | $k_2 (\text{g mg}^{-1} \text{min}^{-1})$   | 66625  | 1620.1 |
|                               | $R^2$                                      | 0.9065 | 0.9447 |
| Intraparticle diffusion model | $k_p (\text{mg g}^{-1} \text{min}^{-0.5})$ | 8.6552 | 9.1908 |
|                               | $R^2$                                      | 0.9490 | 0.9854 |
|                               | $k_p (\text{mg g}^{-1} \text{min}^{-0.5})$ | 3.788  | 4.462  |
|                               | $R^2$                                      | /      | /      |
| Intraparticle diffusion model | $k_p (\text{mg g}^{-1} \text{min}^{-0.5})$ | 0.5517 | 1.1290 |
|                               | $R^2$                                      | 0.9334 | 0.9762 |
|                               | $k_p (\text{mg g}^{-1} \text{min}^{-0.5})$ | 0.1971 | 0.3534 |
|                               | $R^2$                                      | 0.9184 | 0.8587 |

**Table S3** The data of adsorption isotherm of MGO@CP5 towards BF and MB

| Isotherm model   |                                                   | BF     | MB     |
|------------------|---------------------------------------------------|--------|--------|
| Langmuir model   | $q_m (\text{mg g}^{-1})$                          | 132.10 | 239.23 |
|                  | $K_L (\text{L mg}^{-1})$                          | 0.3314 | 0.0383 |
|                  | $R^2$                                             | 0.9911 | 0.9942 |
| Freundlich model | $K_F (\text{mg g}^{-1} (\text{L mg}^{-1})^{1/n})$ | 46.125 | 16.061 |
|                  | $n$                                               | 4.1387 | 1.6172 |
|                  | $R^2$                                             | 0.9876 | 0.9807 |
| Temkin model     | $K_T (\text{mg L}^{-1})$                          | 52.867 | 0.4843 |
|                  | $a$                                               | 14.218 | 47.776 |
|                  | $R^2$                                             | 0.9094 | 0.9699 |

**Table S4** Comparison of adsorption capacities towards MB and BF with various adsorbents

| Adsorbent                                                | Adsorption capacity of adsorbate (mg g <sup>-1</sup> ) |       | Reference |
|----------------------------------------------------------|--------------------------------------------------------|-------|-----------|
|                                                          | MB                                                     | BF    |           |
| Activated carbon fibers                                  | 21.3                                                   | —     | 1         |
| PVA-supported GO aerogels                                | ~25                                                    | —     | 2         |
| MnFe <sub>2</sub> O <sub>4</sub>                         | 25.78                                                  | —     | 3         |
| Algae@Fe <sub>3</sub> O <sub>4</sub>                     | 48.41                                                  | —     | 4         |
| Fe <sub>3</sub> O <sub>4</sub> -clicked GO               | 109.5                                                  | —     | 5         |
| Fe <sub>3</sub> O <sub>4</sub> -MNPs-AC                  | 78.76                                                  | —     | 6         |
| 3D-MGFs                                                  | 298                                                    | —     | 7         |
| CP5-MNPs                                                 | 136.29                                                 | —     | 8         |
| 3D-MSNG-1                                                | 171.53                                                 | —     | 9         |
| Snowflake-shaped magnetic micro-/nanostructure           | 142.9                                                  | —     | 10        |
| Fe <sub>3</sub> O <sub>4</sub> -CD                       | —                                                      | 21.91 | 11        |
| β-CDP-COOH                                               | —                                                      | 70    | 12        |
| Hyd/CB                                                   | —                                                      | 33.75 | 13        |
| XGACCF                                                   | —                                                      | 63.35 | 14        |
| Agar-GO                                                  | 79.51                                                  | 38.11 | 15        |
| XG/CFLO                                                  | 24.54                                                  | 36.23 | 16        |
| Fe <sub>3</sub> O <sub>4</sub> @GO@PDA@poly(NASS-co-DMC) | 170.3                                                  | 289.7 | 17        |
| MGO@CP5                                                  | 240                                                    | 132.1 | This work |

## Reference

- 1 L. Zhang, L. Y. Tu, Y. Liang, Q. Chen, Z. S. Li, C. H. Li, Z. H. Wang and W. Li, *RSC Adv.*, 2018, **8**, 42280-42291.
- 2 J. Dai, T. Huang, S. Q. Tian, Y. J. Xiao, J. H. Yang, N. Zhang, Y. Wang and Z. W. Zhou, *Mater. Des.*, 2016, **107**, 187-197.
- 3 L. Yang, Y. Zhang, X. Liu, X. Jiang, Z. Zhang, T. Zhang and L. Zhang, *Chem. Eng. J.*, 2014, **246**, 88-96.
- 4 P. Pietrzyk, E. I. Borowska, P. Hejduk, B. C. Camargo, M. Warczak, T. P. Nguyen, A. Pregowska, M. Gniadek, J. Szczytko, S. Wilczewski and M. Osial, *Environ. Sci. Pollut. Res.*, 2023, **30**, 62689-62703.
- 5 M. Namvari and H. Namazi, *Int. J. Environ. Sci. Technol.*, 2014, **11**, 1527-1536.
- 6 A. R. Bagheri, M. Ghaedi, A. Asfaram, A. A. Bazrafshan and R. Jannesar, *Ultrason. Sonochem.*, 2017, **34**, 294-304.
- 7 Y. Yang, G. Hu, F. Chen, J. Liu, W. Liu, H. Zhang and B. Wang, *Chem. Comm.*, 2015, **51**, 14405-14408.
- 8 H. Zhang, J. R. Wu, X. Wang, X. S. Li, M. X. Wu, F. Liang and Y. W. Yang, *Dyes Pigm.*, 2019, **162**, 512-516.
- 9 Y. Rong, Y. Huang, P. Jin, C. Yang, Z. Zhong, C. Dong and W. Liang, *J. Water Process. Eng.*, 2020, **37**, 101345-101356.
- 10 X. M. Zhang, J. Y. Liu, S. J. Kelly, X. J. Huang and J. H. Liu, *J. Mater. Chem. A*, 2014, **2**, 11759-11768.
- 11 J. H. Ning, D. E. Chen, Y. L. Liu, S. E. Huang, F. X. Wang, R. Wei, Q. C. Hu, J. Q. Wei and C. Sun, *J. Cent. South Univ.*, 2022, **28**, 3666-3680.
- 12 H. Pu, P. Tang, L. Zhao, Q. Sun, Y. Zhai, Z. Li, N. Gan, Y. Liu, X. Ren and H. Li, *RSC Adv.*, 2020, **10**, 20905-20914.
- 13 P. M. Pakdel, S. J. Peighambardoust, R. Foroutan, N. Arsalani and H. Aghdasinia, *Int. J. Biol. Macromol.*, 2022, **222**, 2083-2097.
- 14 I. Spiridon, I. Apostol, N. C. Anghel and M. F. Zaltariov, *Appl. Organomet. Chem.*, 2022, **36**, e6670-e6686.
- 15 C. M. B. D. Araujo, M. G. Ghislandi, A. G. Rios, G. R. B. D. Costa, B. F. D. Nascimento, A. F. P. Ferreira, M. A. D. Motta Sobrinho and A. E. Rodrigues, *Colloids Surf. A Physicochem. Eng. Asp.*, 2022, **639**, 128357-128371.
- 16 I. Apostol, N. Anghel, F. Doroftei, A. Bele and I. Spiridon, *Mater. Today Chem.*, 2023, **27**, 101299-121314.
- 17 C. Bo, Z. Jia, B. Liu, X. Dai, G. Ma and Y. Li, *J. Taiwan Inst. Chem. Eng.*, 2022, **138**, 104499-104511.
